# Supplementary material for: Engineering human PrimPol into an efficient RNA-dependent-DNA primase/polymerase
Source: PubMed Central journal article supplement — Nucleic Acids Res. 2017 Jul 26;45(15):9046–58. doi: 10.1093/nar/gkx633 (PMC5587808; doi:10.1093/nar/gkx633), 2017-07-26
Supplement: gkx633_supp.pdf [file gkx633_supp.pdf]

## Supplementary Data

### Engineering Human PrimPol into an efficient RNA-dependent-DNA primase/polymerase

Rubén Agudo\*#, Patricia A. Calvo, María I. Martínez-Jiménez, and Luis Blanco\*

Centro de Biología Molecular “Severo Ochoa” (CSIC-UAM), Cantoblanco, E-28049 Madrid, Spain.

\* To whom correspondence should be addressed to Luis Blanco. Tel: +34 91 196 46 85; Fax: +34 91 196 44 20; Email: [lblanco@cbm.csic.es](mailto:lblanco@cbm.csic.es). Correspondence may also be addressed to Rubén Agudo. Tel: +34 91 196 46 86; Fax: +34 91 196 44 20; Email: [ruben.agudotorres@ceu.es](mailto:ruben.agudotorres@ceu.es).

#Present Address:Departamento de Ciencias Farmacéuticas y de la Salud, Facultad de Farmacia, Universidad San Pablo CEU, Alcorcón, Madrid, Spain.

## SUPPLEMENTARY MATERIAL AND METHODS

### Primase-polymerase assays on RNA heteropolymeric templates

Priming assays using *HsPrimPol* in the presence of heteropolymeric oligonucleotides were performed as described for GTCC or *GUCC* oligonucleotides using radiolabeled [ $\alpha$ - $^{32}$ P]GTP (16 nM). The specific oligonucleotide template and concentration of additional dNTPs are indicated in the corresponding figure legends.

### SUPPLEMENTARY TABLE AND FIGURES LEGENDS

**Table S1.** Primers used for saturation mutagenesis an enzymatic characterization of *HsPrimPol* in the present work.

| Name              | Sequence (5' → 3') <sup>1</sup>                                     | Amplicon <sup>2</sup> |
|-------------------|---------------------------------------------------------------------|-----------------------|
| Sp1C <sup>3</sup> | gatcacagtgagtac                                                     | N.A.                  |
| T13T <sup>3</sup> | agaagtgatcttgactcactgtgac                                           | N.A.                  |
| T13U <sup>3</sup> | <i>agaaguguaucuuguacucacugugauc<sup>3</sup></i>                     | N.A.                  |
| 88/89-NBC/NDT-Fw  | tatgctgaatttggncbndttataaatccagaaaaatctcttac                        | N.A.                  |
| 88/89-NBC/NDT-rv  | tctggattataahngvncaaaaatcagcataggtgac                               | N.A.                  |
| GTCC              | tttttttttttttttttttttttttttttttctggtttttttttttttttt* <sup>4</sup> t | N.A.                  |
| ATCC              | tttttttttttttttttttttttttttttttctaattttttttttttttt* <sup>4</sup> t  | N.A.                  |
| <i>GUCC</i>       | tttttttttttttttttttttttttttttttccugt                                | N.A.                  |
| NS3-F1            | agctgatggctacacctcaag                                               | 937 nt                |
| NS3-R3            | aatggaggtagcatccacagcgtggc                                          |                       |
| NS5A-F2           | actacctctccagagttttc                                                | 1051 nt               |
| NS5A-R3           | cagcgagtactcaaaggggtgattggcaac                                      |                       |
| GAPDH-Fw          | ctcccactctccacctcg                                                  | 77 nt                 |
| GAPDH-rv          | cataccaggaaatgagcttgacaa                                            |                       |
| BACT-Fw           | ctaaggccaaccgtgaaaag                                                | 104 nt                |
| BACT-rv           | accagaggcatacagggaca                                                |                       |
| 18S-Fw            | ctcaacacgggaaacctcac                                                | 110 nt                |
| 18S-rv            | cgctccaccaactagaacg                                                 |                       |
| PPIA-Fw           | acgccactgtcgcttttc                                                  | 111 nt                |
| PPIA-rv           | gcaaacagctcgaaggagac                                                |                       |
| HPRT1-Fw          | tcctcctcagaccgctttt                                                 | 90 nt                 |

|          |                              |        |
|----------|------------------------------|--------|
| HPRT1-rv | <i>gctggttcatcatcgctaac</i>  |        |
| ARBP-Fw  | <i>gatgccaggggaagacag</i>    | 66 nt  |
| ARBP-rv  | <i>tccaaaagttggatgatctga</i> |        |
| Poly-Fw  | <i>gctggctggtggaagagcgtt</i> | 227 nt |
| Poly-rv  | <i>gagatggccatgcatgctc</i>   |        |
| TFAM-Fw  | <i>caggaggcaaaggatgattc</i>  | 144 nt |
| TFAM-rv  | <i>ccaagactcattcattgtcg</i>  |        |

<sup>1</sup> Nucleotide sequences indicated in italics are composed of ribonucleotides.

<sup>2</sup> Nucleotide (nt) length of the PCR product amplified using the corresponding pair of primers in a PCR reaction. N.A.: not applicable.

<sup>3</sup> Primers provided by the manufacturer already purified by PAGE.

<sup>4</sup> Asterisks indicate phosphorothioate bonds. Underlined sequences highlight the priming site.

**Table S2.** List of *HsPrimPol* variants that showed primase-polymerase activity in the fluorometric screening assay.

| <b>Variant</b>   |
|------------------|
| Y89C             |
| Y89G             |
| <b>Y89R</b>      |
| F88A-Y89L        |
| <b>F88A-Y89N</b> |
| <b>F88A-Y89R</b> |
| F88C-Y89S        |
| F88G-Y89D        |
| F88G-Y89G        |
| F88G-Y89S        |
| <b>F88I-Y89R</b> |
| F88L-Y89S        |
| F88P-Y89R        |
| <b>F88R-Y89S</b> |
| <b>F88S-Y89C</b> |
| <b>F88S-Y89H</b> |
| <b>F88T-Y89H</b> |
| <b>F88V-Y89N</b> |

Purified variants whose primase activity was confirmed by *in vitro* assays on GTCC and GUCC oligonucleotide template (as described in Materials and Methods) are shown in bold.

**Figure S1. Fluorometric detection of DNA primase-polymerase activity using crude cell extracts overexpressing different *HsPrimPol* variants.** Primase-polymerase activity was measured as the fluorescence increase produced by tight binding of SYBR® green I dye to nascent dsDNA. **A)** fluorescence kinetics of five independent replicates, assayed with supernatants from cells overexpressing WT *HsPrimPol* in the presence of the GTCC template, dGTP, dATP and MnCl<sub>2</sub>. **B)** Same as (A), but using supernatants from cells overexpressing the catalytically inactive AxA *HsPrimPol* mutant (1). Fluorescence increase was observed only when a catalytic-competent *HsPrimPol* was present. Experimental conditions used for screening are described in Materials and Methods. **C)** Fluorescence kinetics shown by different supernatants *from HsPrimPol* variants in a representative RdDP activity screening assay using *GUCC* as template. Sequence of mutants displaying RdDP activity is shown.

**Figure S2. *HsPrimPol* priming on heteropolymeric ssRNA templates.** Primase activity of WT *HsPrimPol* or its Y89R variant was determined using either T13U (1 μM; 28 nt) or HCV RNA (150 ng; ≈9600 nt) as template, 16 nM [α-<sup>32</sup>P]dGTP, 10 μM dGTP, and 100 μM dATP, dCTP, dTTP. “nt”, control experiment of *HsPrimPol* reaction without added RNA as template. Arrowheads indicate specific primase products. “\*”, adducts produced by *HsPrimPol* in the absence of exogenously added template. Reaction conditions are described in Supplementary Materials and Methods.

1. Garcia-Gomez, S., Reyes, A., Martinez-Jimenez, M.I., Chocron, E.S., Mouron, S., Terrados, G., Powell, C., Salido, E., Mendez, J., Holt, I.J. *et al.* PrimPol, an archaic primase/polymerase operating in human cells. *Mol Cell*, **52**, 541-553.

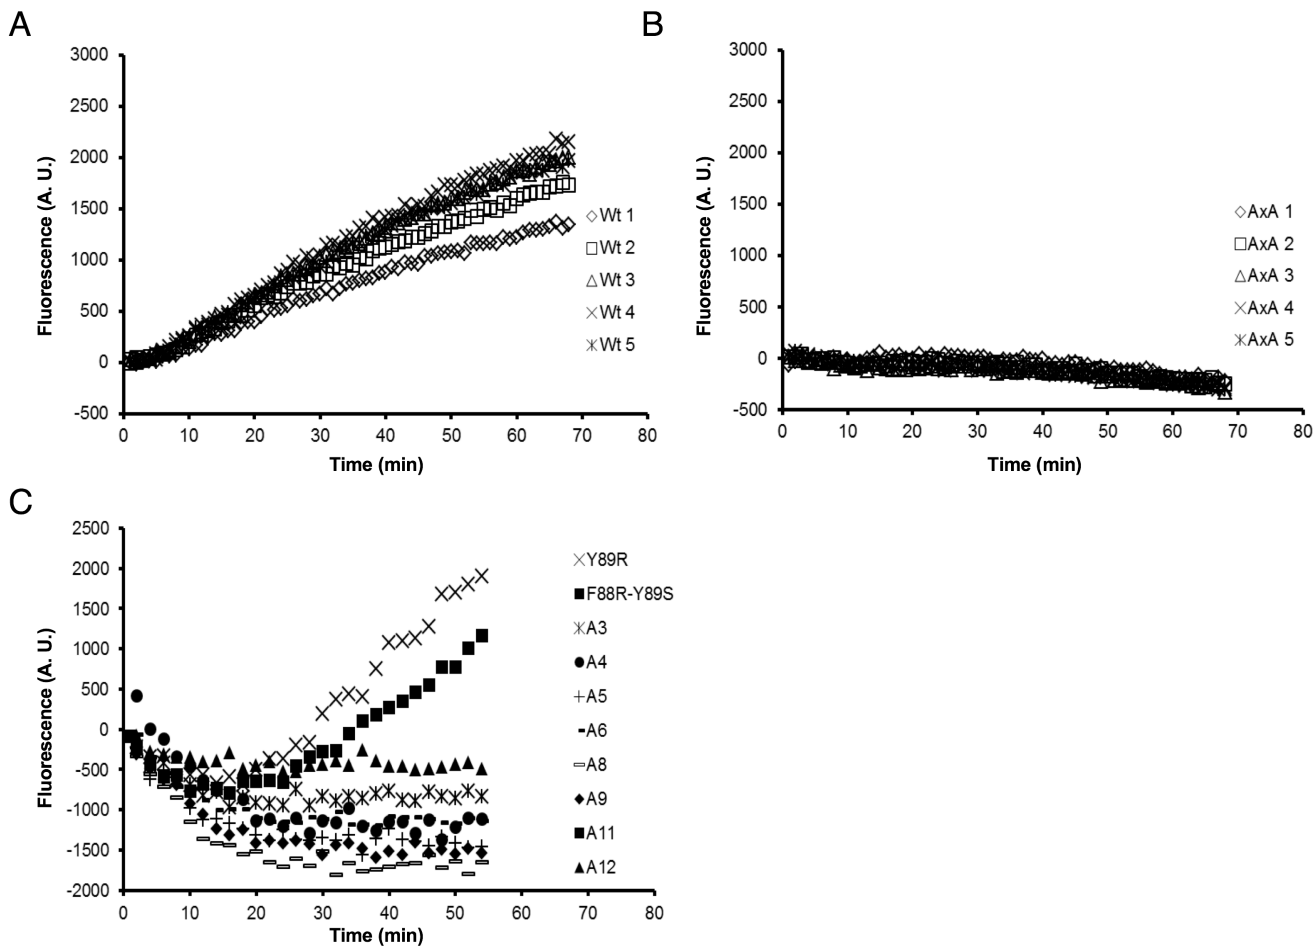

Figure S1 Agudo et al.

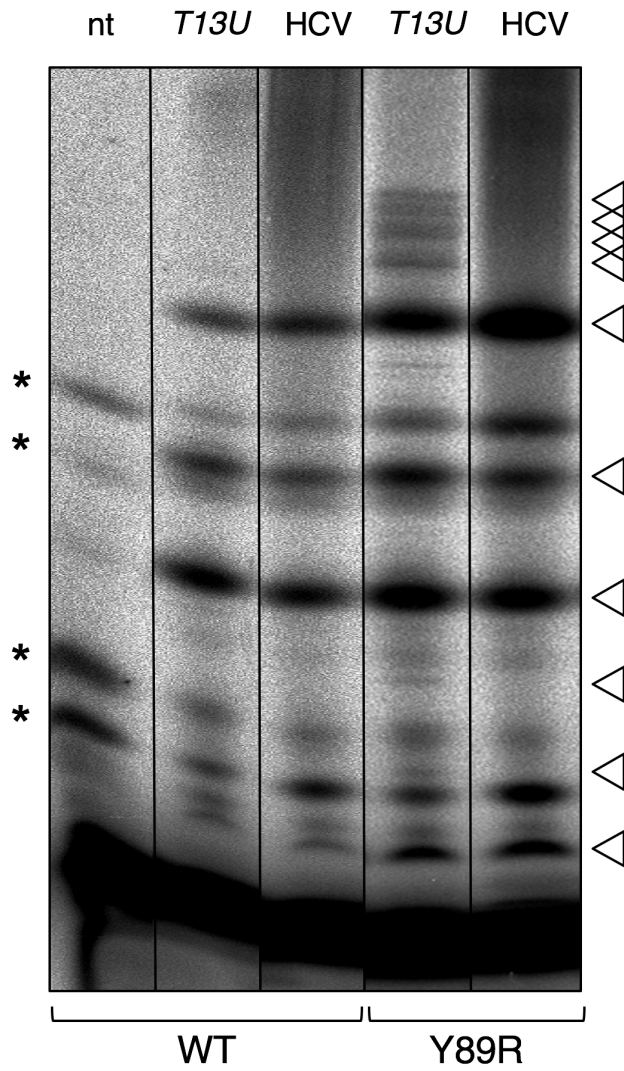

Figure S2 Agudo et al.
